# Supplementary material for: Treatment- and population-specific genetic risk factors for anti-drug antibodies against interferon-beta: a GWAS
Source: PubMed Central journal article supplement (PMC7641861; doi:10.1186/s12916-020-01769-6), 2020-11-04

**Regional association plots of replicated and top pooled GWAS variants in the analysis across treatment preparations.**

Regional association plots of variants from the GWAS generated using LocusZoom v1.4 and the 1000 Genomes 1000G\_Nov2014 EUR reference panel. The color of dots indicates LD with the lead variant (pink). Gray dots represent signals with missing LD  $r^2$  values. If no LD information was present in the database on the top variant, LD with the variant showing the second-lowest  $p$ -value is indicated. The grey line indicates genome-wide significance. cM: centimorgan, chr: chromosome, Mb: mega base pairs.

Regional association plot for variant rs9281971 in the analysis of **nADA presence** in the **discovery-stage** GWAS of combined treatments. LD information is shown for variant chr6:32597924 instead of rs9281971.

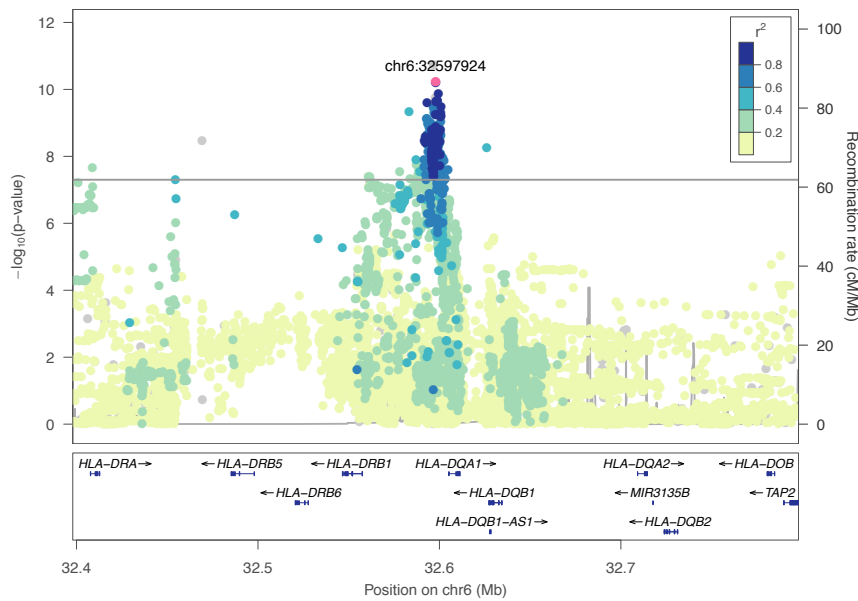

Regional association plot for variant rs9281971 in the analysis of **nADA presence** in the pooled **discovery + replication** GWAS of combined treatments. LD information is shown for variant chr6:32597924 instead of rs9281971.

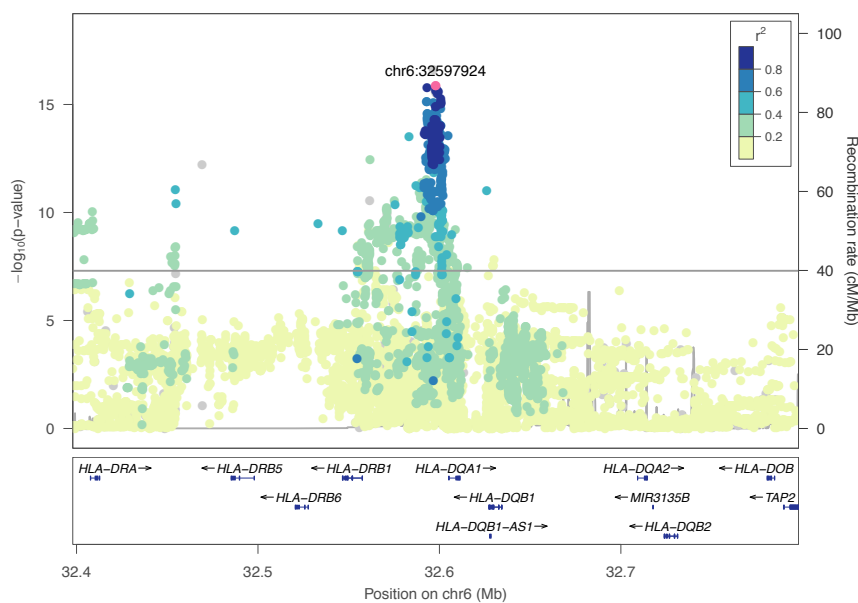

## Genetic risk for anti-drug antibodies against interferon-beta – Regional association plots

Regional association plot for variant rs9271377 in the analysis of **nADA titers** in the **discovery-stage** GWAS of combined treatments.

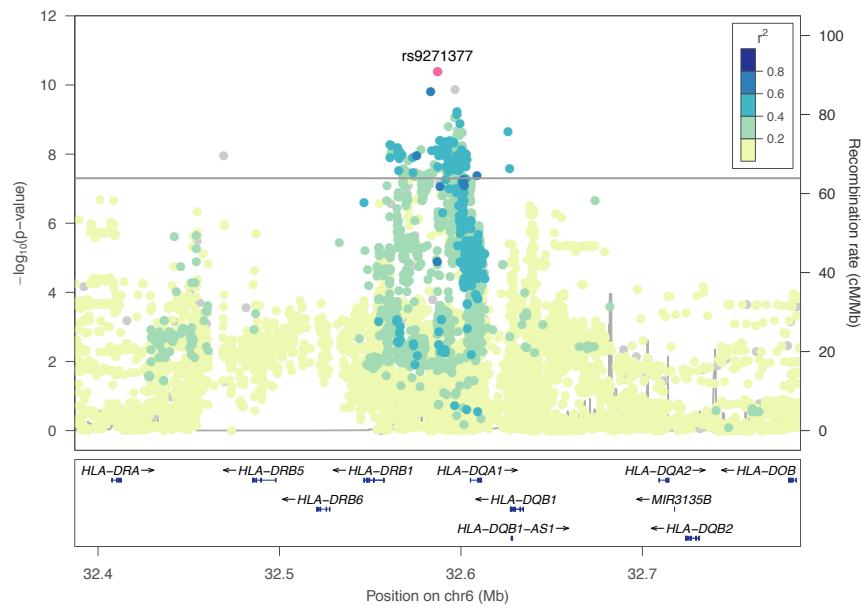

Regional association plot for variant rs9281971 in the analysis of **nADA titers** in the pooled **discovery + replication** GWAS of combined treatments. LD information is shown for variant chr6:32593179 instead of rs9281971.

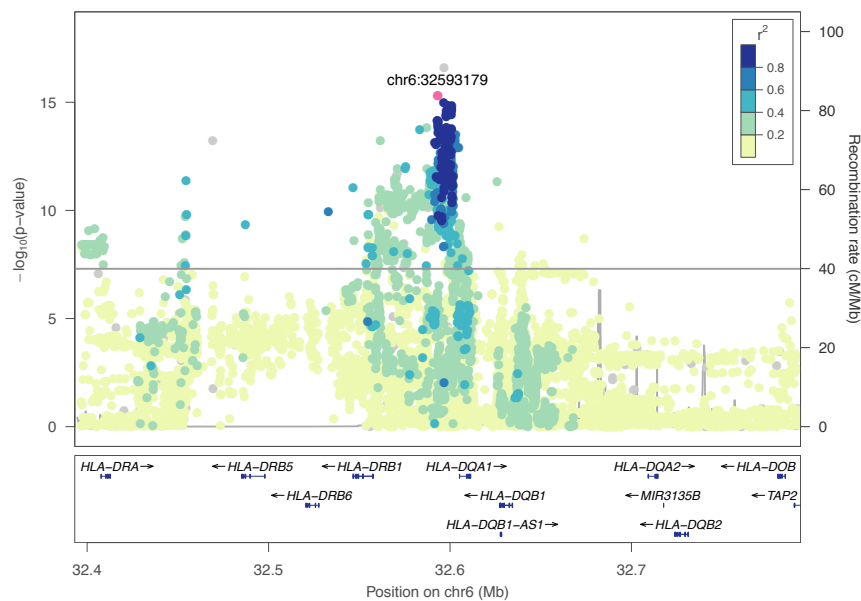

## Genetic risk for anti-drug antibodies against interferon-beta – Regional association plots

Regional association plot for variant rs9271377 in the analysis of **bADA** levels in the **discovery-stage** GWAS of combined treatments.

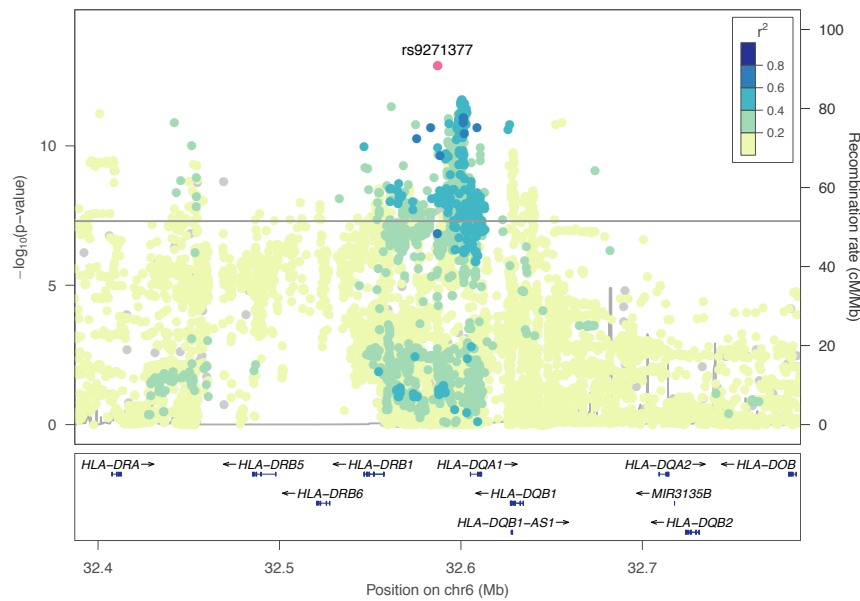

Regional association plot for variant rs9267515 in the analysis of **bADA** levels in the **discovery-stage** GWAS of combined treatments.

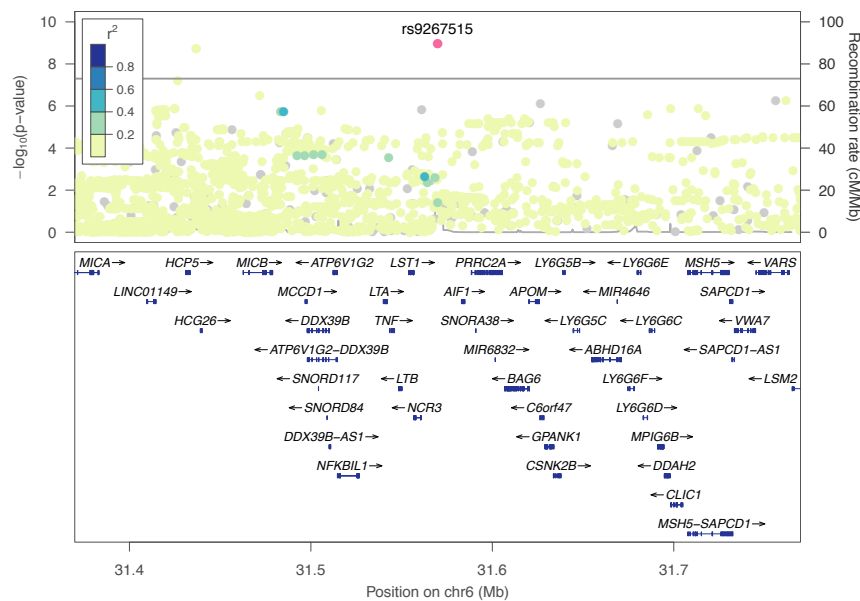

## Genetic risk for anti-drug antibodies against interferon-beta – Regional association plots

Regional association plot for variant rs9260765 in the analysis of **bADA levels** in in the **discovery-stage** GWAS of combined treatments.

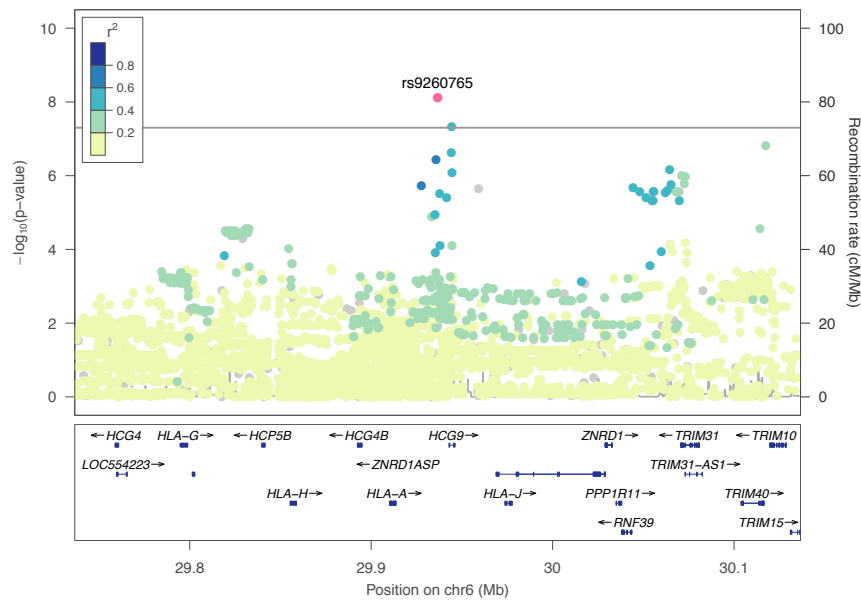

Regional association plot for variant rs9272071 in the analysis of **bADA levels** in in the **pooled discovery + replication** GWAS of combined treatments.

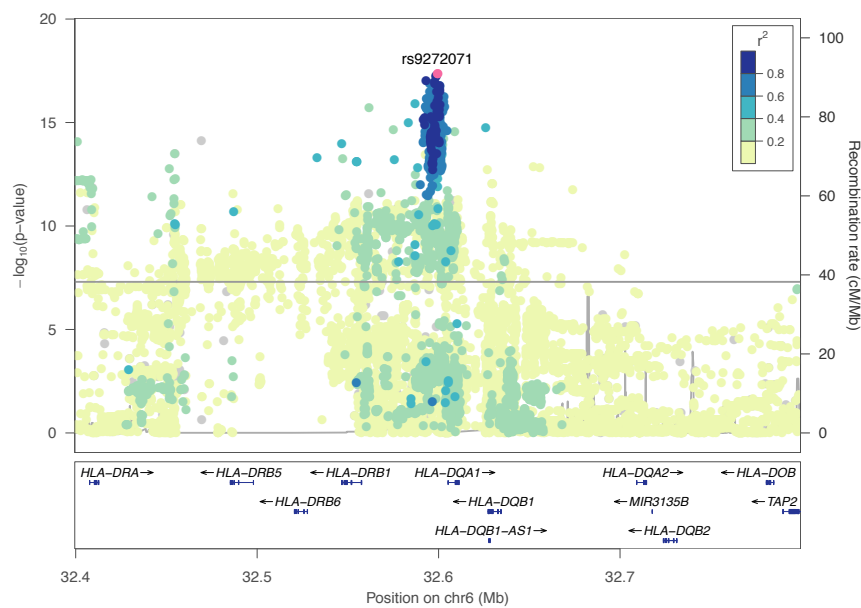

Supplement: 12916_2020_1769_MOESM13_ESM.pdf [file 12916_2020_1769_MOESM13_ESM.pdf]
