# Supplementary material for: Treatment- and population-specific genetic risk factors for anti-drug antibodies against interferon-beta: a GWAS
Source: PubMed Central journal article supplement (PMC7641861; doi:10.1186/s12916-020-01769-6), 2020-11-04

Genetic risk for anti-drug antibodies against interferon-beta – **Forest plots**

**Forest plots of replicated and top pooled GWAS variants and HLA alleles in the analysis across treatment preparations.**

Green: IFNβ-1a s.c., blue: IFNβ-1a i.m., orange: IFNβ-1b s.c., magenta: pooled discovery-/replication-stage analyses. D. = discovery, R. = replication, P. = pooled discovery + replication.

Forest plot for the GWAS variant rs9281971 in the combined analysis of nADA presence.

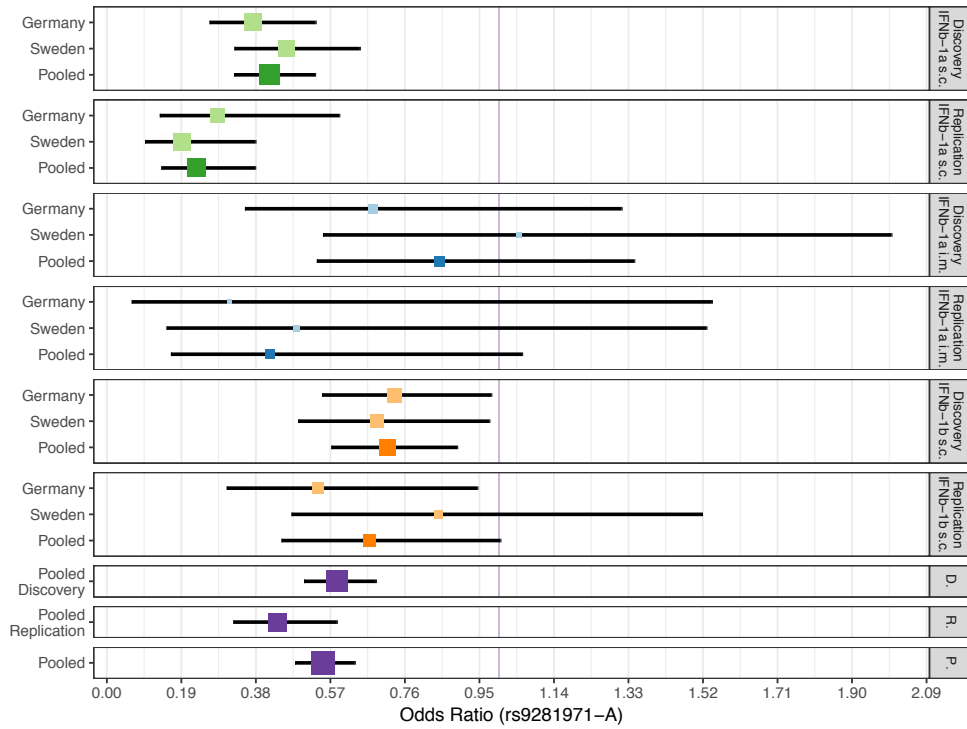

Forest plot for the GWAS variant rs9271377 in the combined analysis of nADA titers.

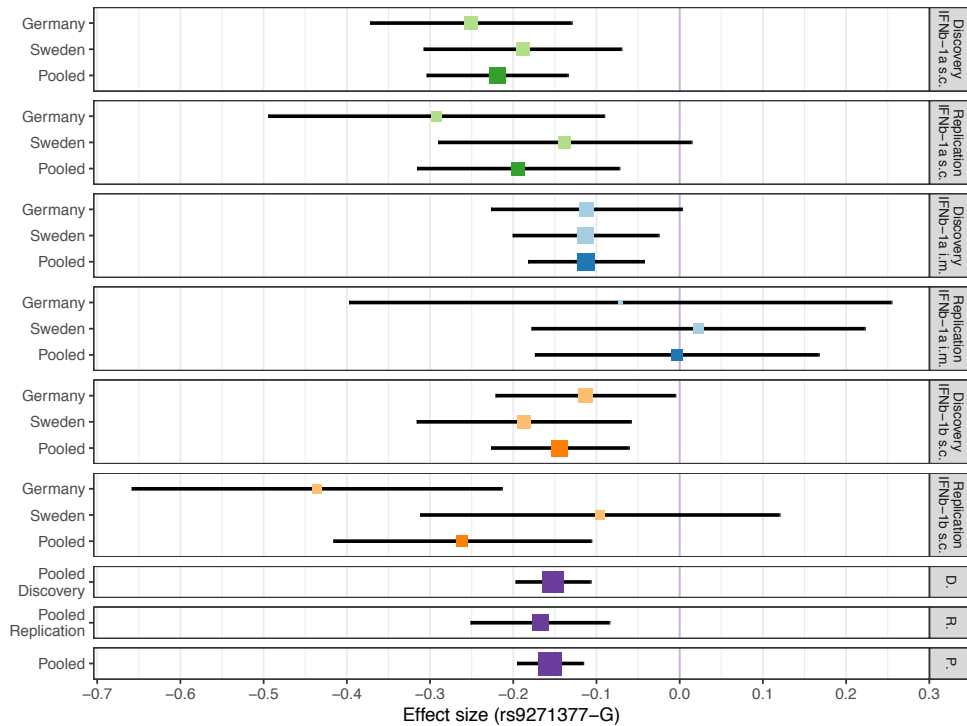

Genetic risk for anti-drug antibodies against interferon-beta – **Forest plots**

Forest plot for the GWAS variant rs9281971 in the combined analysis of **nADA titers**.

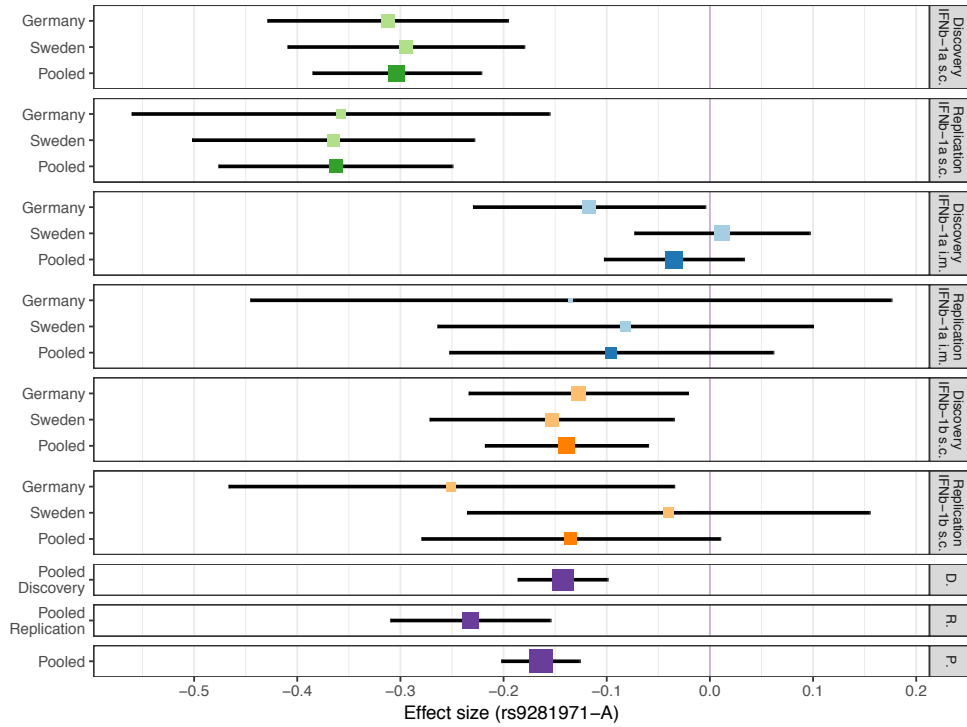

Forest plot for the GWAS variant rs9271377 in the combined analysis of **bADA levels**.

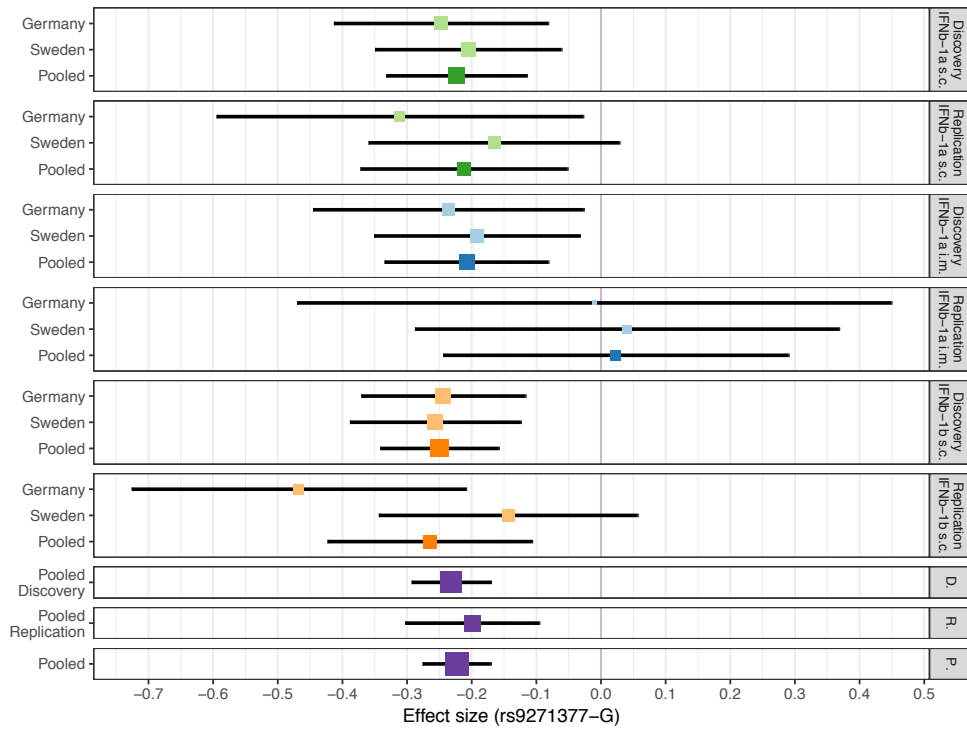

## Genetic risk for anti-drug antibodies against interferon-beta – Forest plots

Forest plot for the GWAS variant rs9267515 in the combined analysis of **bADA** levels.

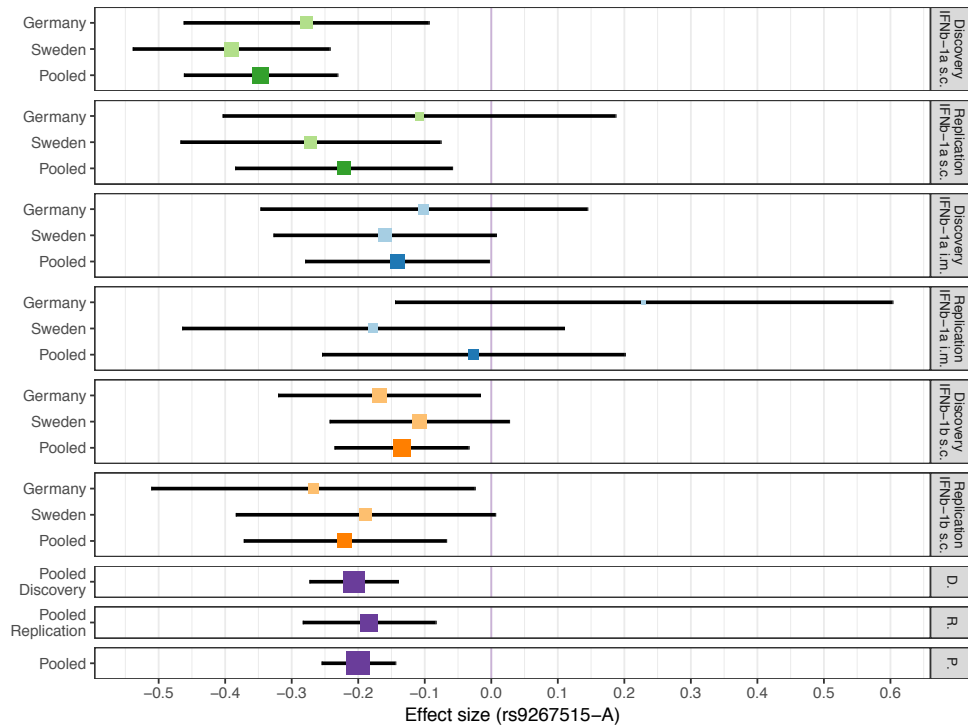

Forest plot for the GWAS variant rs9260765 in the combined analysis of **bADA** levels.

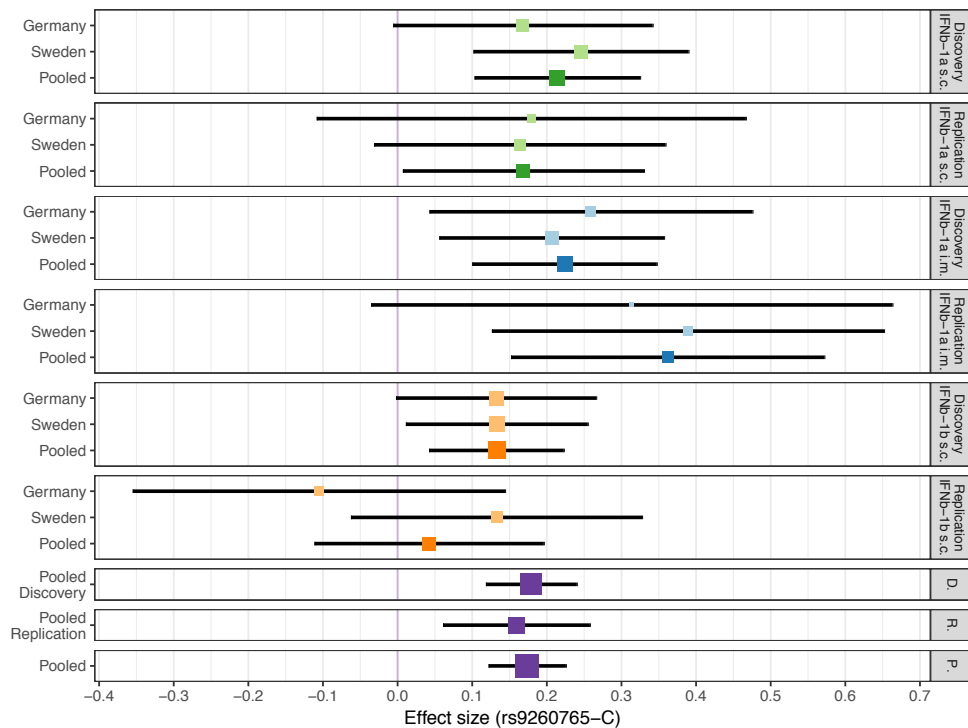

## Genetic risk for anti-drug antibodies against interferon-beta – Forest plots

Forest plot for the GWAS variant rs9272071 in the combined analysis of **bADA** levels.

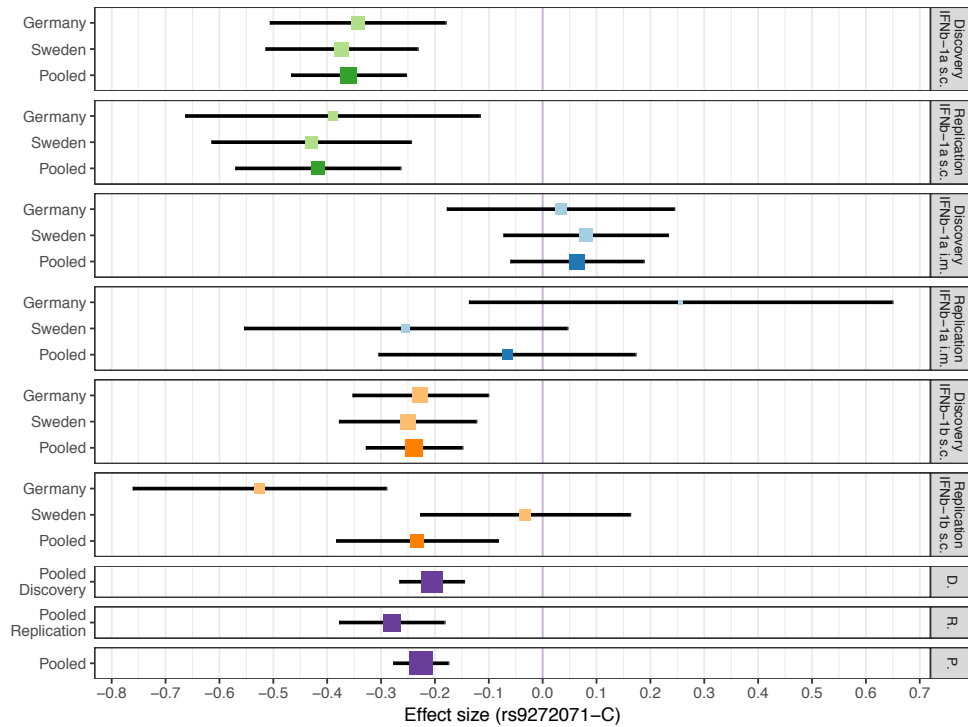

Forest plot for the *HLA* allele *HLA-DQA1\*01:02* in the combined analysis of **bADA** levels.

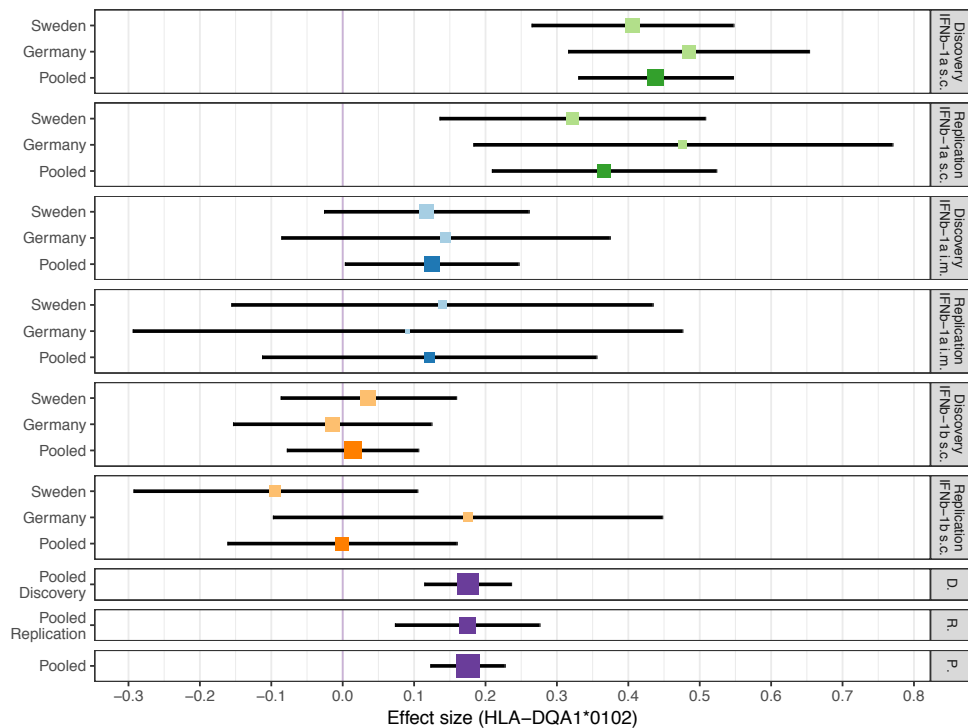

## Genetic risk for anti-drug antibodies against interferon-beta – Forest plots

Forest plot for the extended *HLA* haplotype *B7-DQ6* in the combined analysis of **bADA** levels.

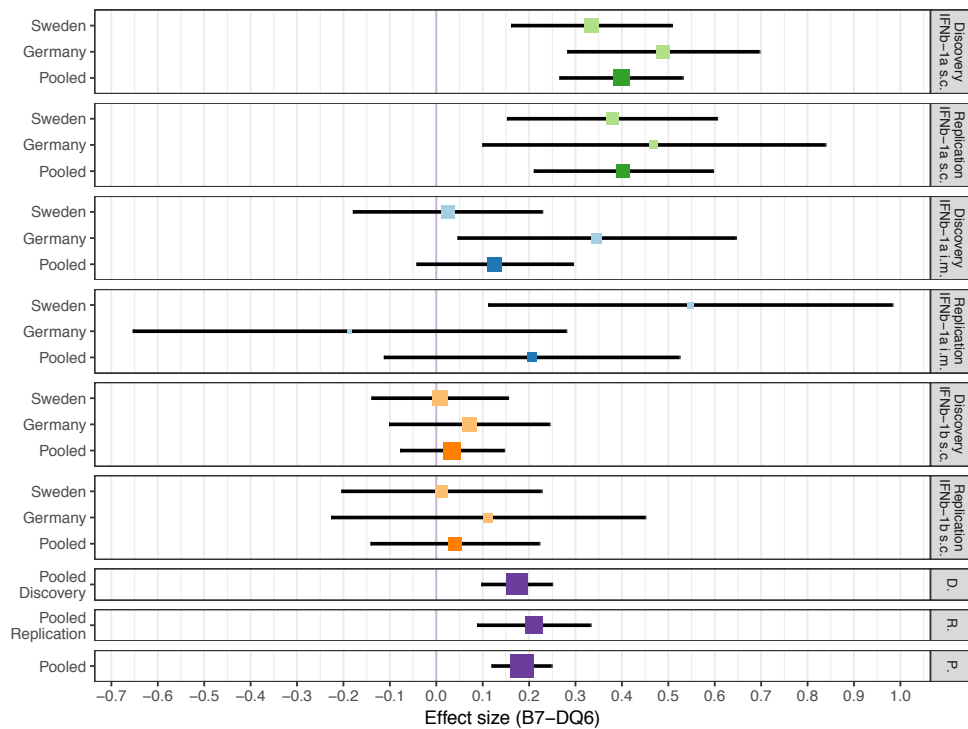

Forest plot for the extended *HLA* haplotype *DR3-DQ2* in the combined analysis of **bADA** levels.

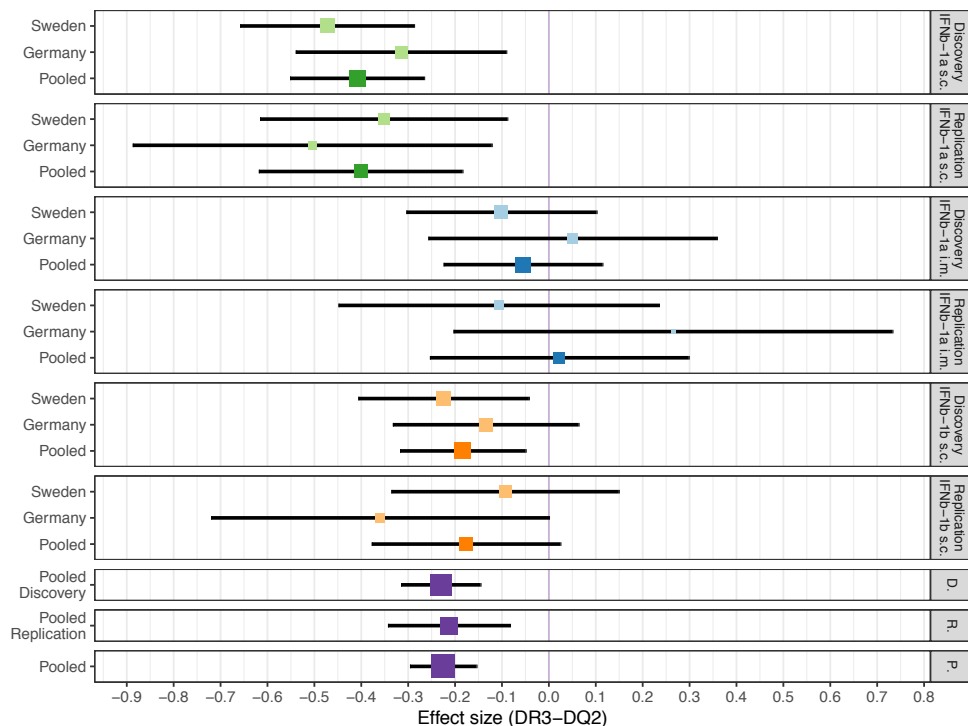

Supplement: 12916_2020_1769_MOESM14_ESM.pdf [file 12916_2020_1769_MOESM14_ESM.pdf]
