# Supplementary material for: Treatment- and population-specific genetic risk factors for anti-drug antibodies against interferon-beta: a GWAS
Source: PubMed Central journal article supplement (PMC7641861; doi:10.1186/s12916-020-01769-6), 2020-11-04

Genetic risk for anti-drug antibodies against interferon-beta – **Forest plots**

**Forest plots of replicated and top pooled GWAS variants and *HLA* alleles in the analysis of IFNβ-1b s.c.-treated patients.**

Green: IFNβ-1a s.c., blue: IFNβ-1a i.m., orange: IFNβ-1b s.c., magenta: pooled discovery-/replication-stage analyses. D. = discovery, R. = replication, P. = pooled discovery + replication.

**Forest plot for the GWAS variant rs28366299 in the IFNβ-1b s.c. analysis of nADA presence.**

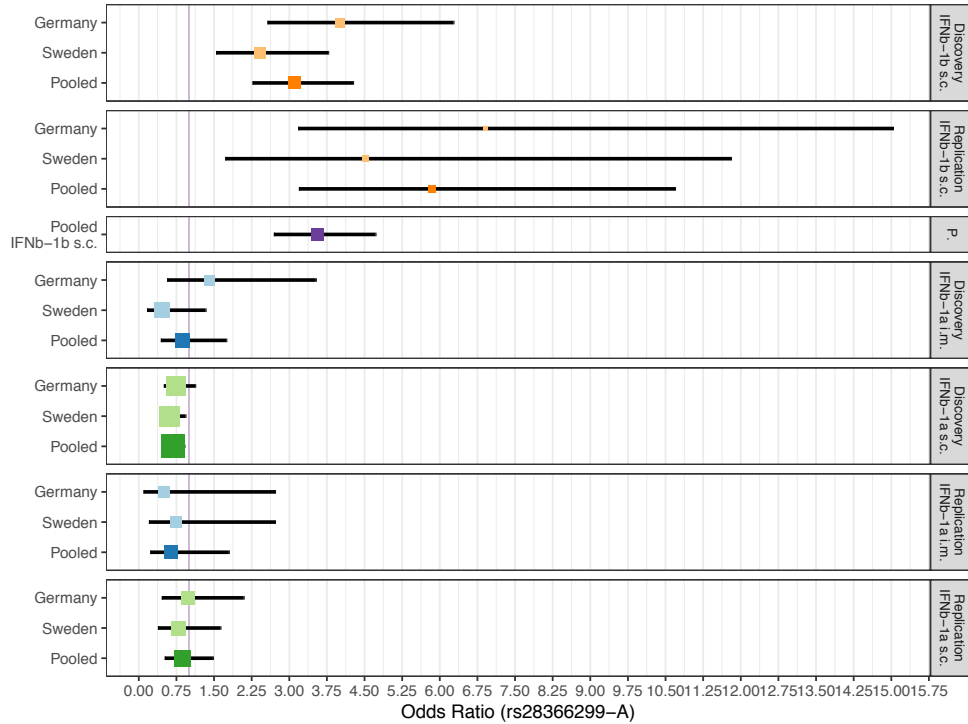

**Forest plot for the *HLA* allele *HLA-DRB1\*04:01* in the IFNβ-1b s.c. analysis of nADA presence.**

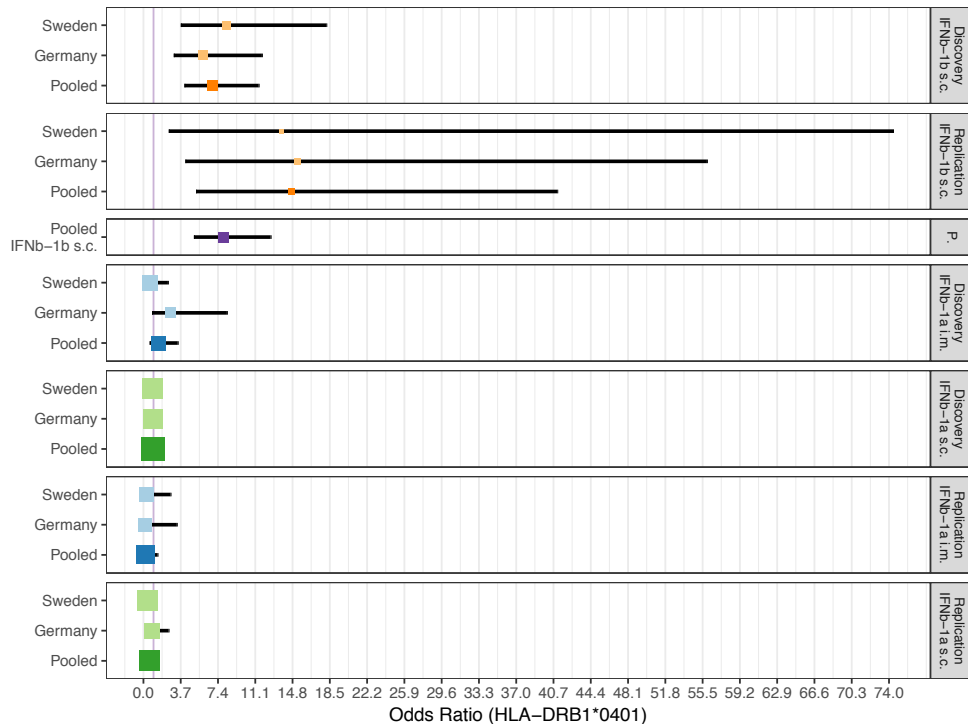

## Genetic risk for anti-drug antibodies against interferon-beta – Forest plots

Forest plot for the extended *HLA* haplotype *DR4-DQ3* in the IFN $\beta$ -1b s.c. analysis of **nADA presence**.

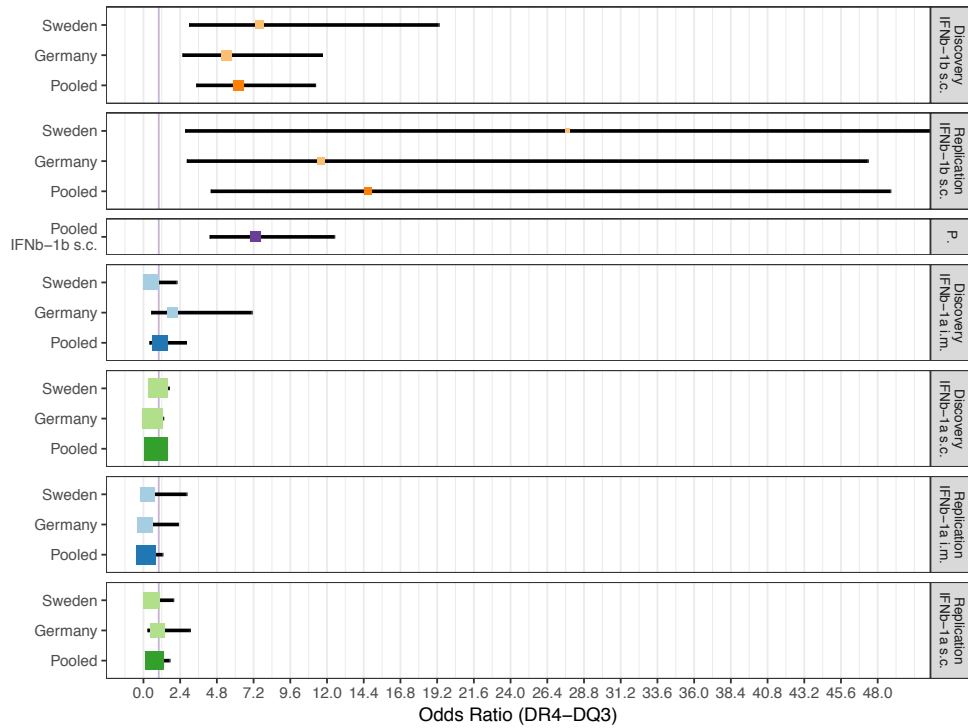

Forest plot for the GWAS variant rs28366299 in the IFN $\beta$ -1b s.c. analysis of **nADA titers**.

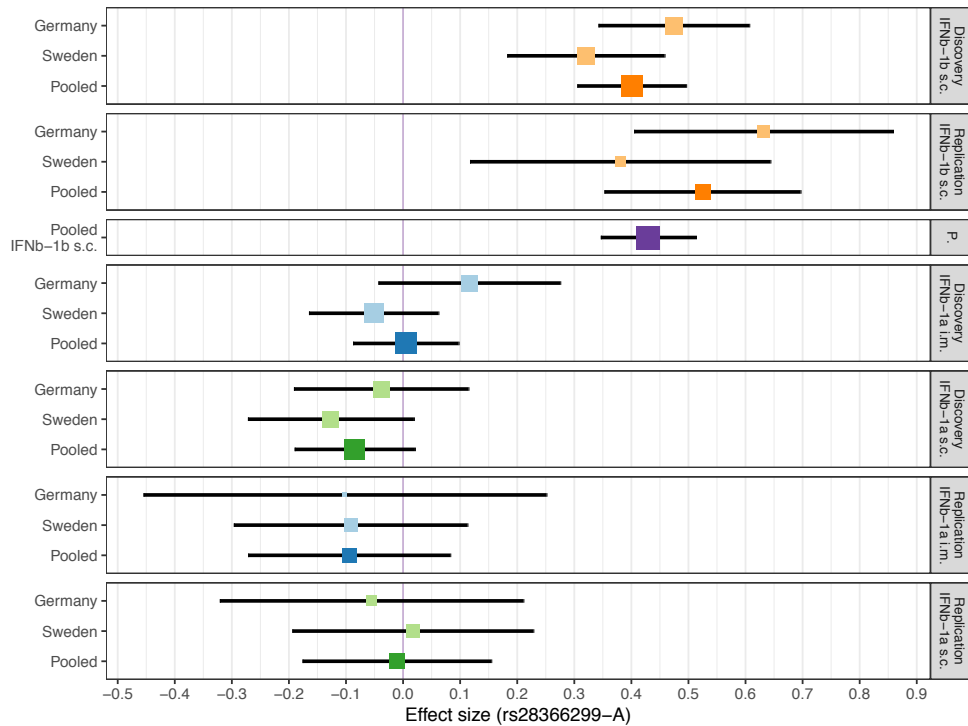

## Genetic risk for anti-drug antibodies against interferon-beta – Forest plots

Forest plot for the GWAS variant rs2071479 in the IFN $\beta$ -1b s.c. analysis of nADA titers.

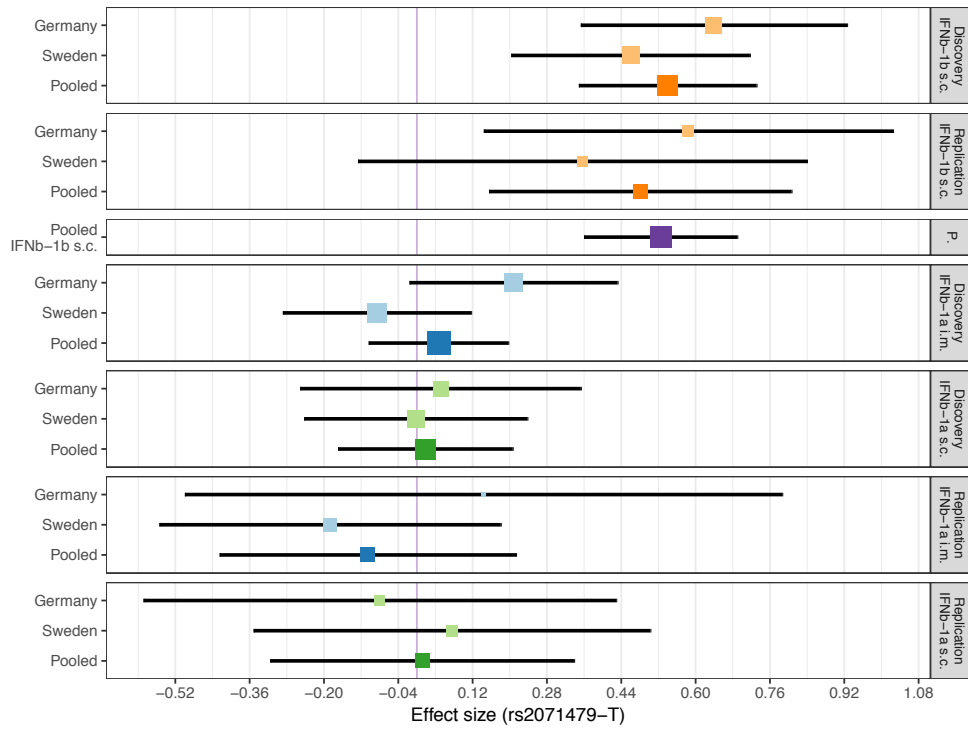

Forest plot for the GWAS variant rs9272775 in the IFN $\beta$ -1b s.c. analysis of nADA titers.

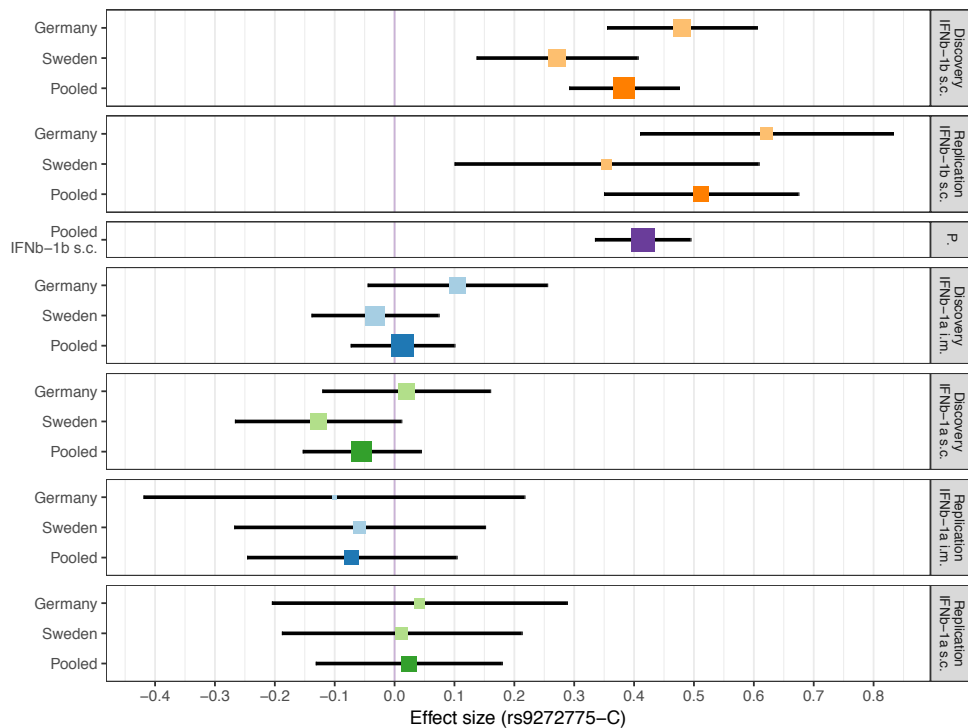

## Genetic risk for anti-drug antibodies against interferon-beta – Forest plots

Forest plot for the *HLA* allele *HLA-DRB1\*04:01* in the IFN $\beta$ -1b s.c. analysis of nADA titers.

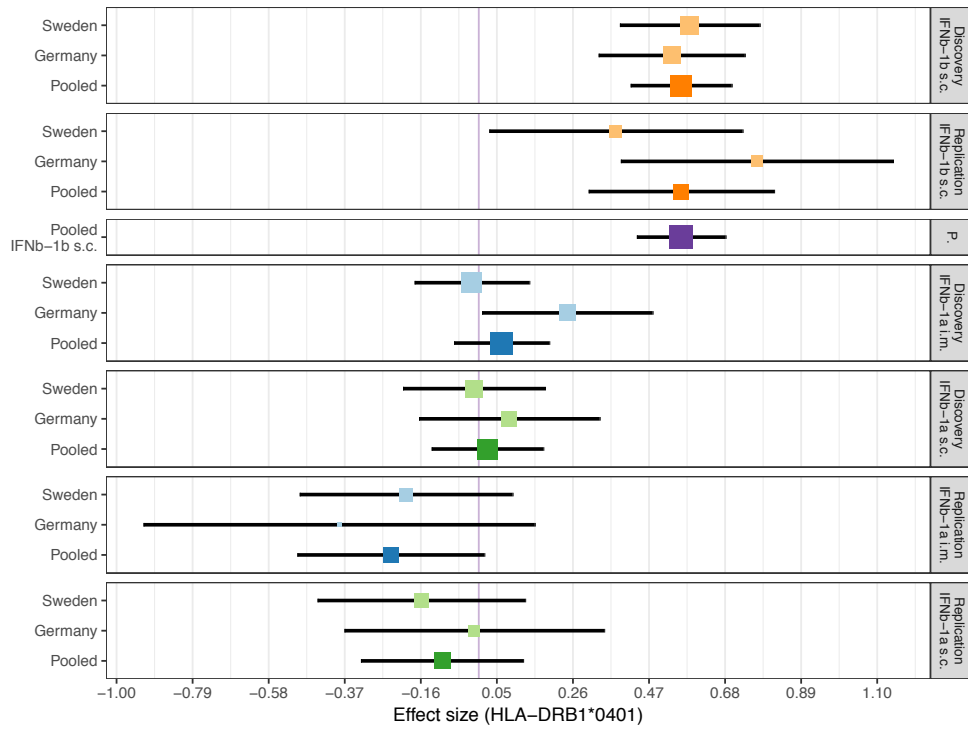

Forest plot for the extended *HLA* haplotype *DR4-DQ3* in the IFN $\beta$ -1b s.c. analysis of nADA titers.

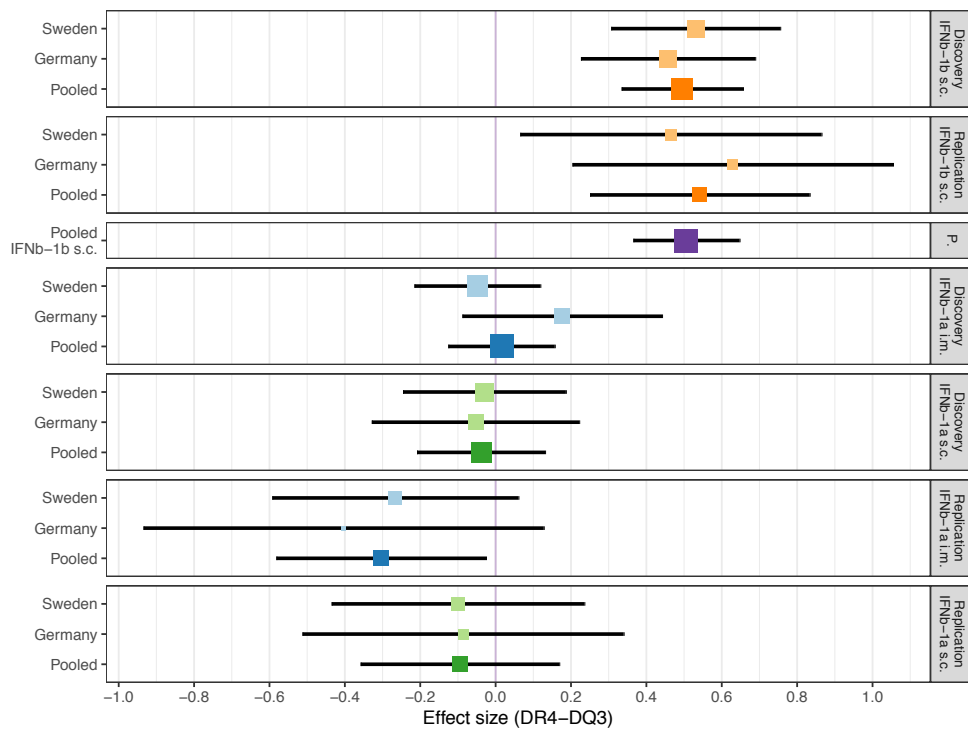

## Genetic risk for anti-drug antibodies against interferon-beta – Forest plots

Forest plot for the GWAS variant rs78279385 in the IFN $\beta$ -1b s.c. analysis of bADA levels.

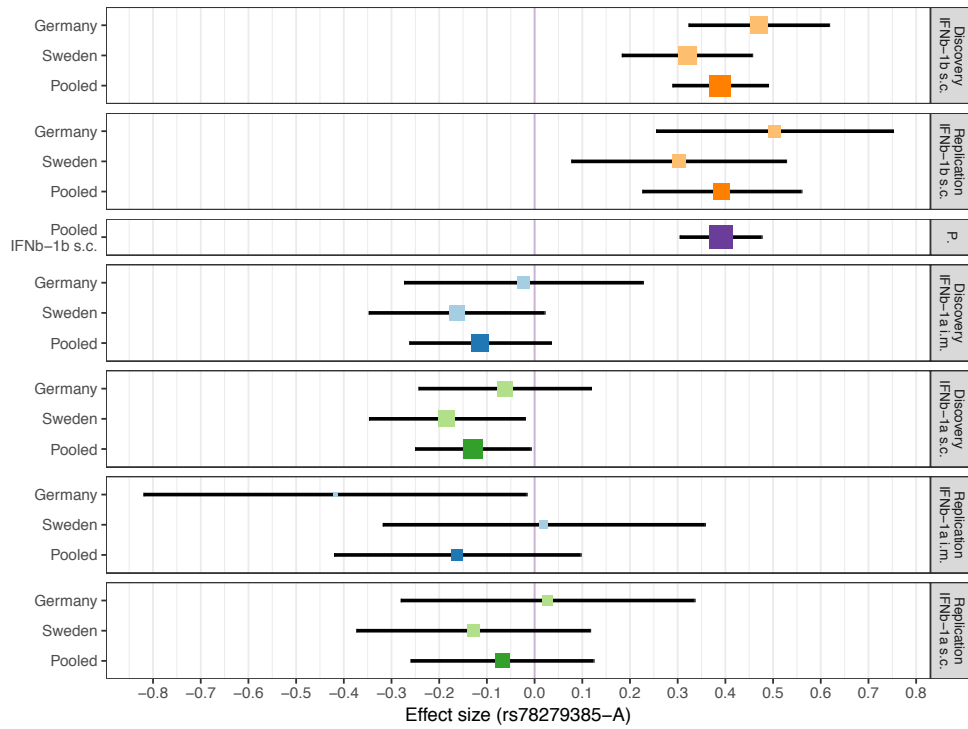

Forest plot for the GWAS variant rs57912571 in the IFN $\beta$ -1b s.c. analysis of bADA levels.

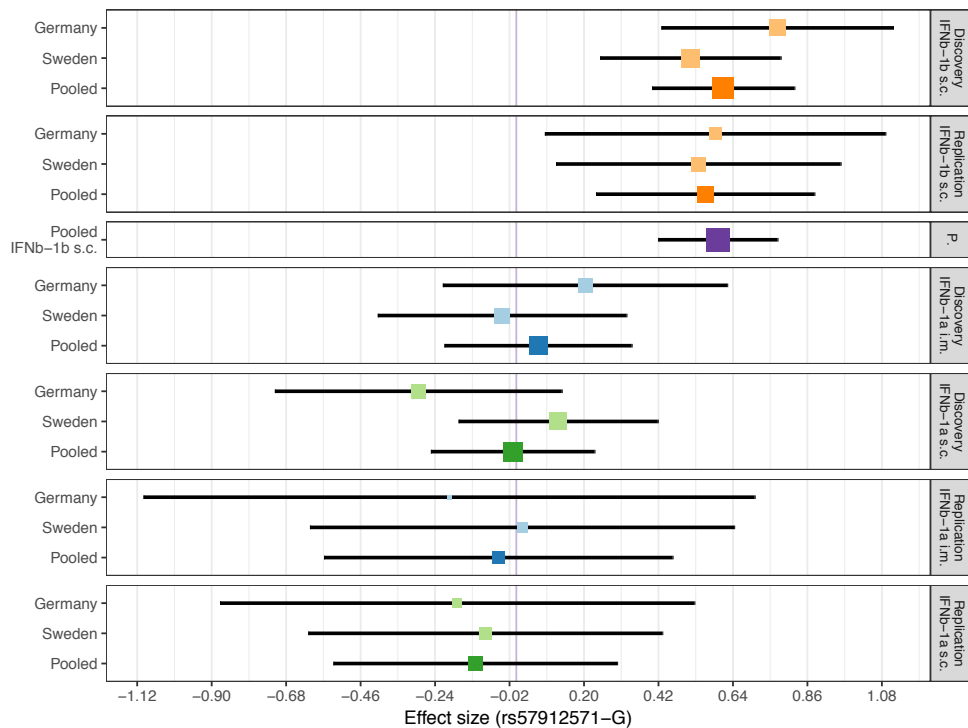

## Genetic risk for anti-drug antibodies against interferon-beta – Forest plots

Forest plot for the GWAS variant rs9272775 in the IFN $\beta$ -1b s.c. analysis of bADA levels.

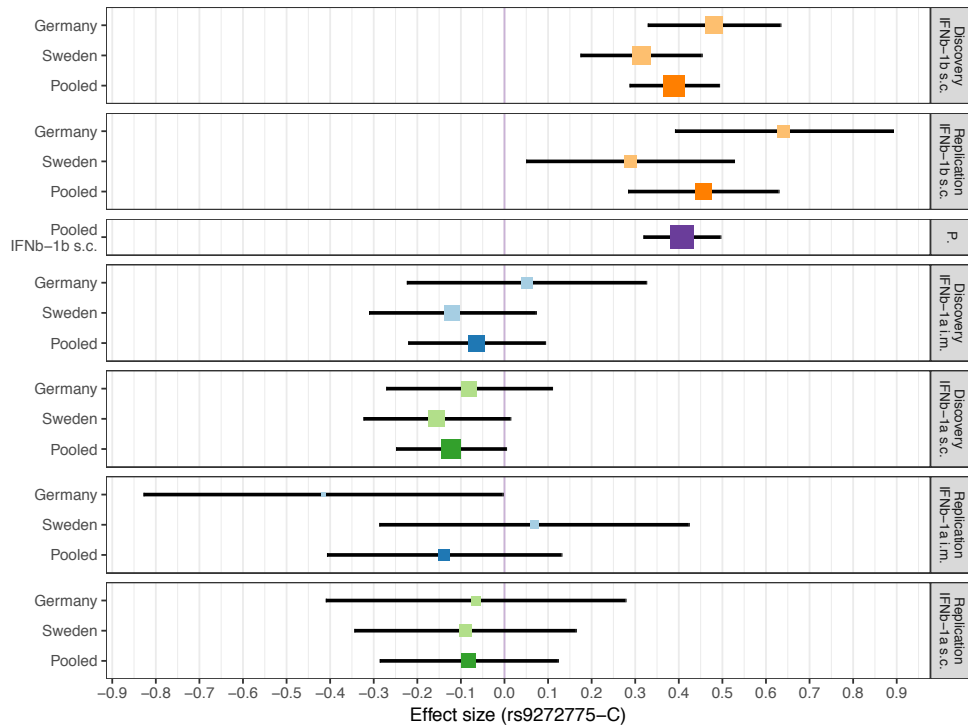

Forest plot for the HLA allele *HLA-DRB1\*04:01* in the IFN $\beta$ -1b s.c. analysis of bADA levels.

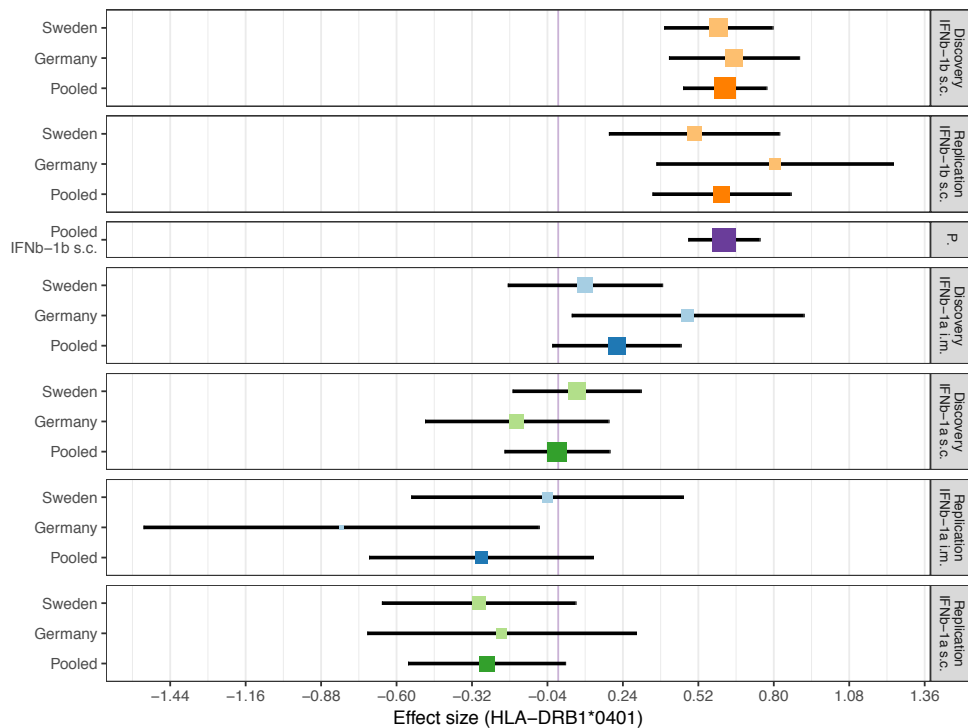

## Genetic risk for anti-drug antibodies against interferon-beta – Forest plots

Forest plot for the extended *HLA* haplotype *DR4-DQ3* in the IFN $\beta$ -1b s.c. analysis of **bADA** levels.

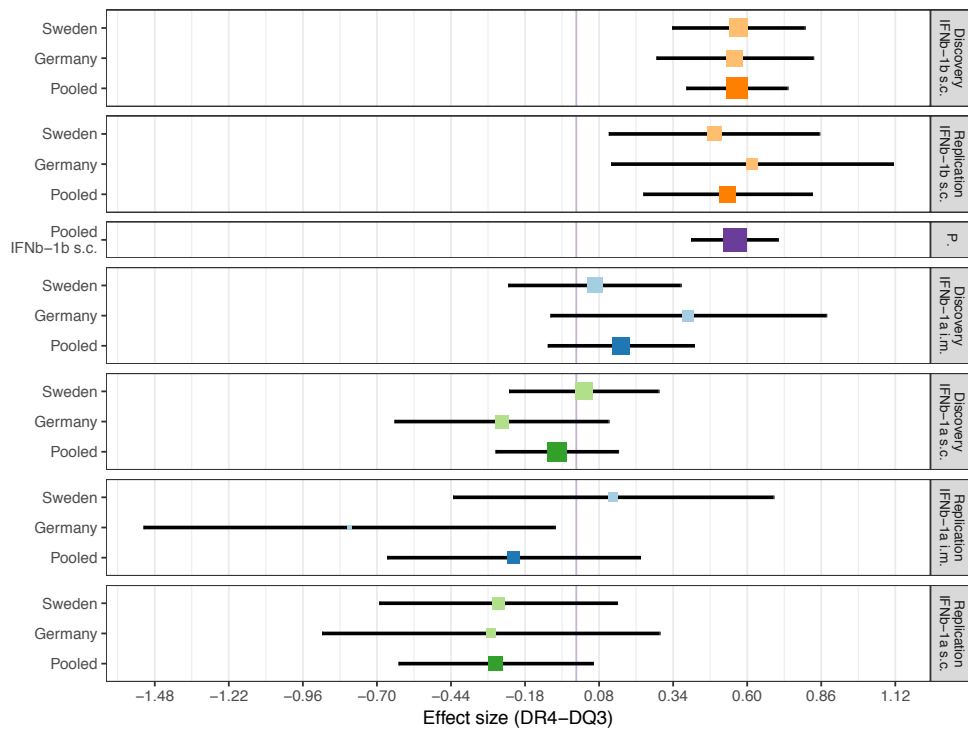

Supplement: 12916_2020_1769_MOESM21_ESM.pdf [file 12916_2020_1769_MOESM21_ESM.pdf]
