# Supplementary material for: Treatment- and population-specific genetic risk factors for anti-drug antibodies against interferon-beta: a GWAS
Source: PubMed Central journal article supplement (PMC7641861; doi:10.1186/s12916-020-01769-6), 2020-11-04

Genetic risk for anti-drug antibodies against interferon-beta – **Top prediction models**

**Treatment-specific prediction of the presence of nADA in the replication data: comparison of top models.**

For each top model, the plots show either the AUC and its 95 % CI or Nagelkerke’s pseudo- $R^2$  and its 95 % CI. Boxes show the prediction groups (replication data) and columns within each box the training data groups (discovery data). Bonferroni = significant after Bonferroni correction for multiple testing; nominal = nominally significant ( $p < 0.05$ ); n.s. = not significant.

**A:** Prediction of the presence of nADA using analyses on the presence of nADA. AUC of the model with the highest AUC for each treatment preparation.

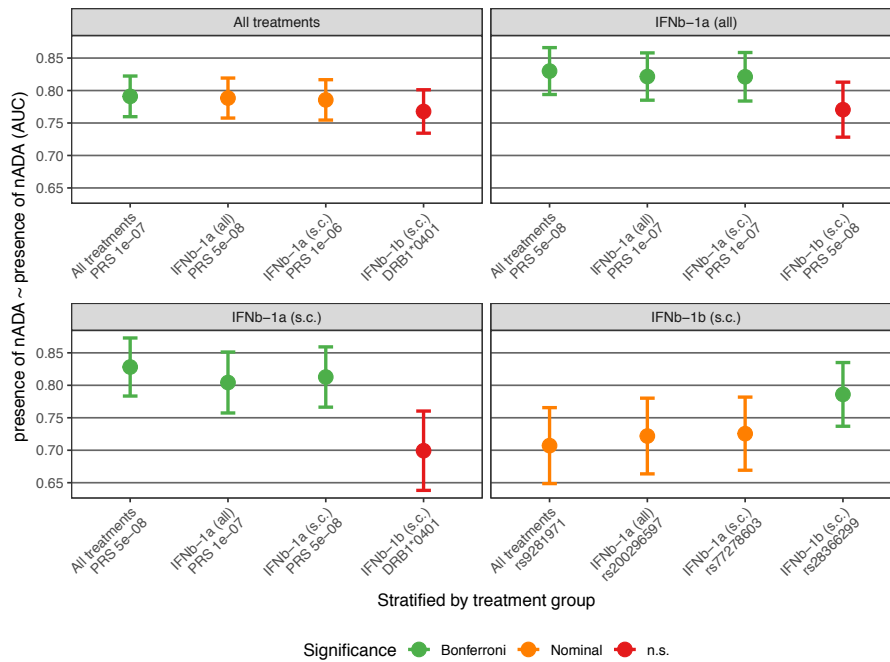

**B:** Prediction of the presence of nADA using analyses on the presence of nADA. Nagelkerke’s pseudo- $R^2$  of the model with the highest AUC for each treatment preparation.

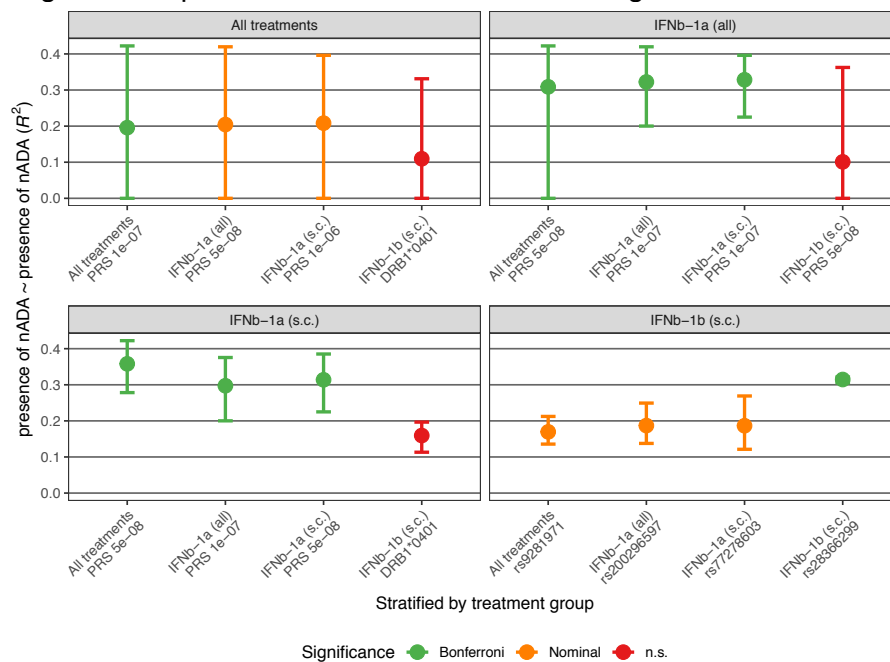

## Genetic risk for anti-drug antibodies against interferon-beta – Top prediction models

**C:** Prediction of the presence of nADA using analyses of nADA titers. AUC of the model with the highest AUC for each treatment preparation.

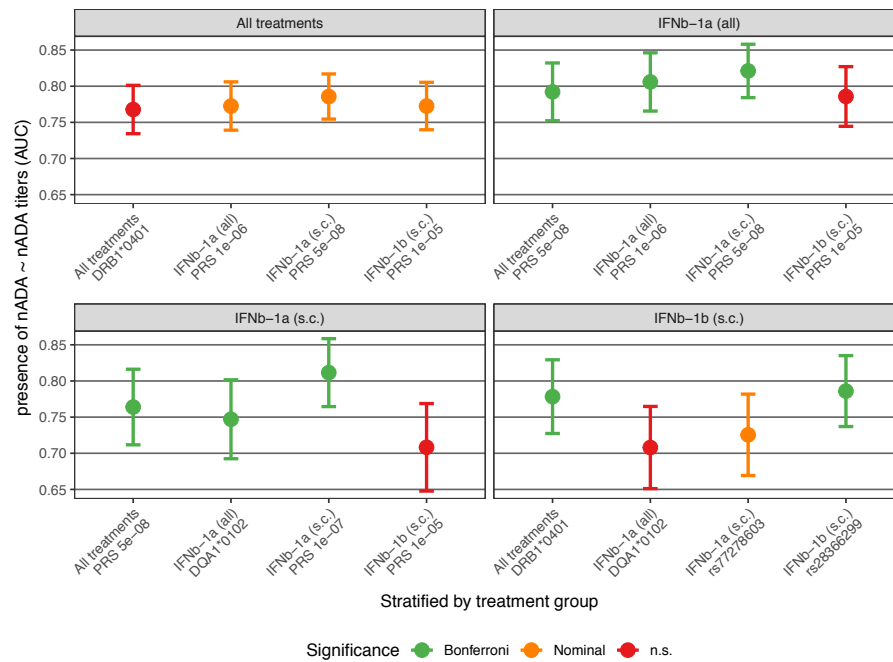

**D:** Prediction of the presence of nADA using analyses of nADA titers. Nagelkerke's pseudo- $R^2$  of the model with the highest AUC for each treatment preparation.

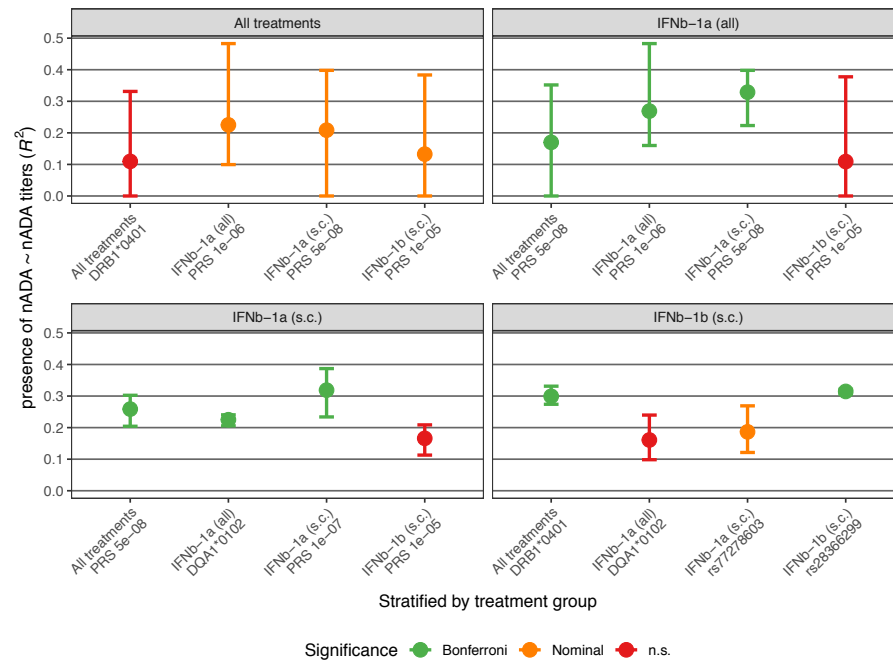

## Genetic risk for anti-drug antibodies against interferon-beta – Top prediction models

**E:** Prediction of the presence of nADA using analyses of bADA levels. AUC of the model with the highest AUC for each treatment preparation.

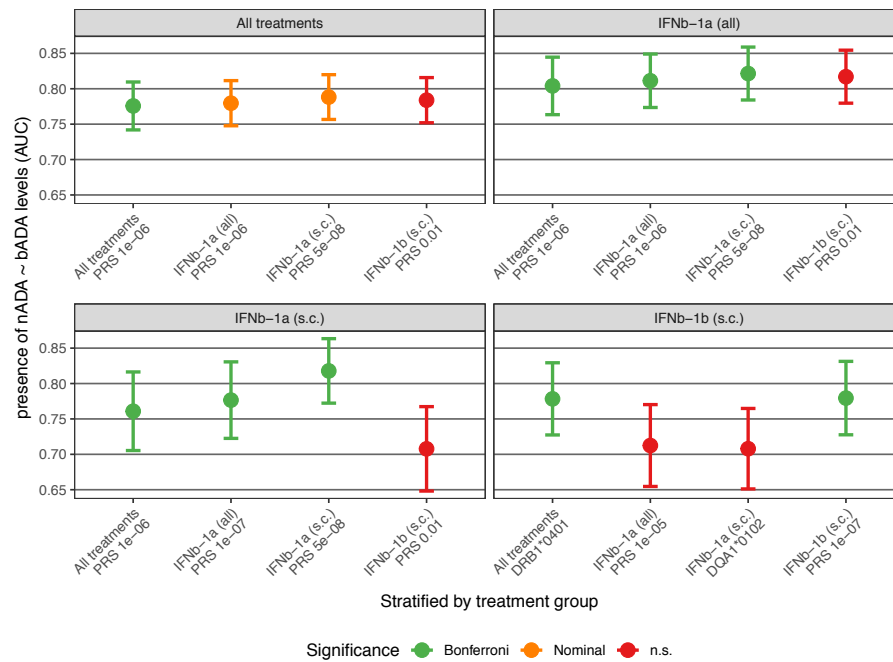

**F:** Prediction of the presence of nADA using analyses of bADA levels. Nagelkerke's pseudo- $R^2$  of the model with the highest AUC for each treatment preparation.

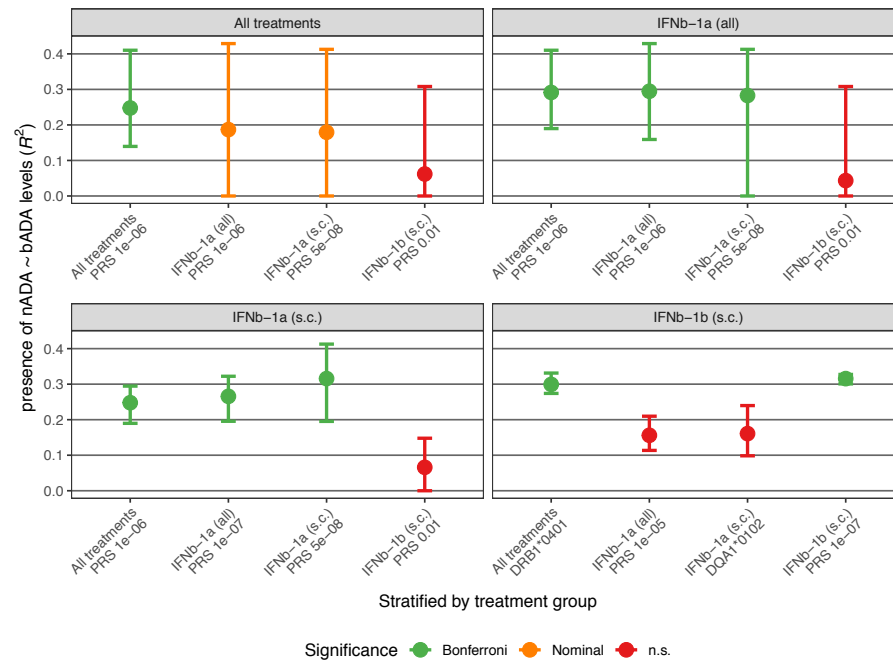

Supplement: 12916_2020_1769_MOESM26_ESM.pdf [file 12916_2020_1769_MOESM26_ESM.pdf]
