# Supplementary material for: Treatment- and population-specific genetic risk factors for anti-drug antibodies against interferon-beta: a GWAS
Source: PubMed Central journal article supplement (PMC7641861; doi:10.1186/s12916-020-01769-6), 2020-11-04
Supplement: 12916_2020_1769_MOESM1_ESM.pdf [file 12916_2020_1769_MOESM1_ESM.pdf]

Karolinska Institutet, Stockholm, Sweden

Previous measurement: **negative**

293

404

237

IFN $\beta$ -1a *i.m.*

IFN $\beta$ -1a *s.c.*

IFN $\beta$ -1b *s.c.*

Previous measurement: **positive**

52

186

222

IFN $\beta$ -1a *i.m.*

IFN $\beta$ -1a *s.c.*

IFN $\beta$ -1b *s.c.*

Technical University of Munich, Germany

Previous measurement: **negative**

215

383

287

IFN $\beta$ -1a *i.m.*

IFN $\beta$ -1a *s.c.*

IFN $\beta$ -1b *s.c.*

Previous measurement: **positive**

36

175

267

IFN $\beta$ -1a *i.m.*

IFN $\beta$ -1a *s.c.*

IFN $\beta$ -1b *s.c.*

Adaptive randomization

All samples

Neutralizing anti-drug antibodies (nADA)

Measurement site 1: Innsbruck

891

862

Sweden

Germany

Measurement site 2: Copenhagen

495

500

Sweden

Germany

Screening and, if positive, titration (Luciferase bioassay)

Binding ADA (bADA)

Measurement site: Munich

2752

Levels (capture ELISA)
