# Supplementary material for: Treatment- and population-specific genetic risk factors for anti-drug antibodies against interferon-beta: a GWAS
Source: PubMed Central journal article supplement (PMC7641861; doi:10.1186/s12916-020-01769-6), 2020-11-04
Supplement: 12916_2020_1769_MOESM3_ESM.pdf [file 12916_2020_1769_MOESM3_ESM.pdf]

Karolinska Institutet, Stockholm, Sweden

New measurement: **negative**

297

383

212

IFN $\beta$ -1a *i.m.*

IFN $\beta$ -1a *s.c.*

IFN $\beta$ -1b *s.c.*

New measurement: **positive**

45

204

245

IFN $\beta$ -1a *i.m.*

IFN $\beta$ -1a *s.c.*

IFN $\beta$ -1b *s.c.*

Technical University of Munich, Germany

New measurement: **negative**

210

370

298

IFN $\beta$ -1a *i.m.*

IFN $\beta$ -1a *s.c.*

IFN $\beta$ -1b *s.c.*

New measurement: **positive**

41

188

255

IFN $\beta$ -1a *i.m.*

IFN $\beta$ -1a *s.c.*

IFN $\beta$ -1b *s.c.*

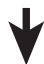

Discovery

999 / 995

997 / 999

Sweden

Germany

Replication

394 / 391

362 / 363

Sweden

Germany
