# Supplementary material for: Treatment- and population-specific genetic risk factors for anti-drug antibodies against interferon-beta: a GWAS
Source: PubMed Central journal article supplement (PMC7641861; doi:10.1186/s12916-020-01769-6), 2020-11-04

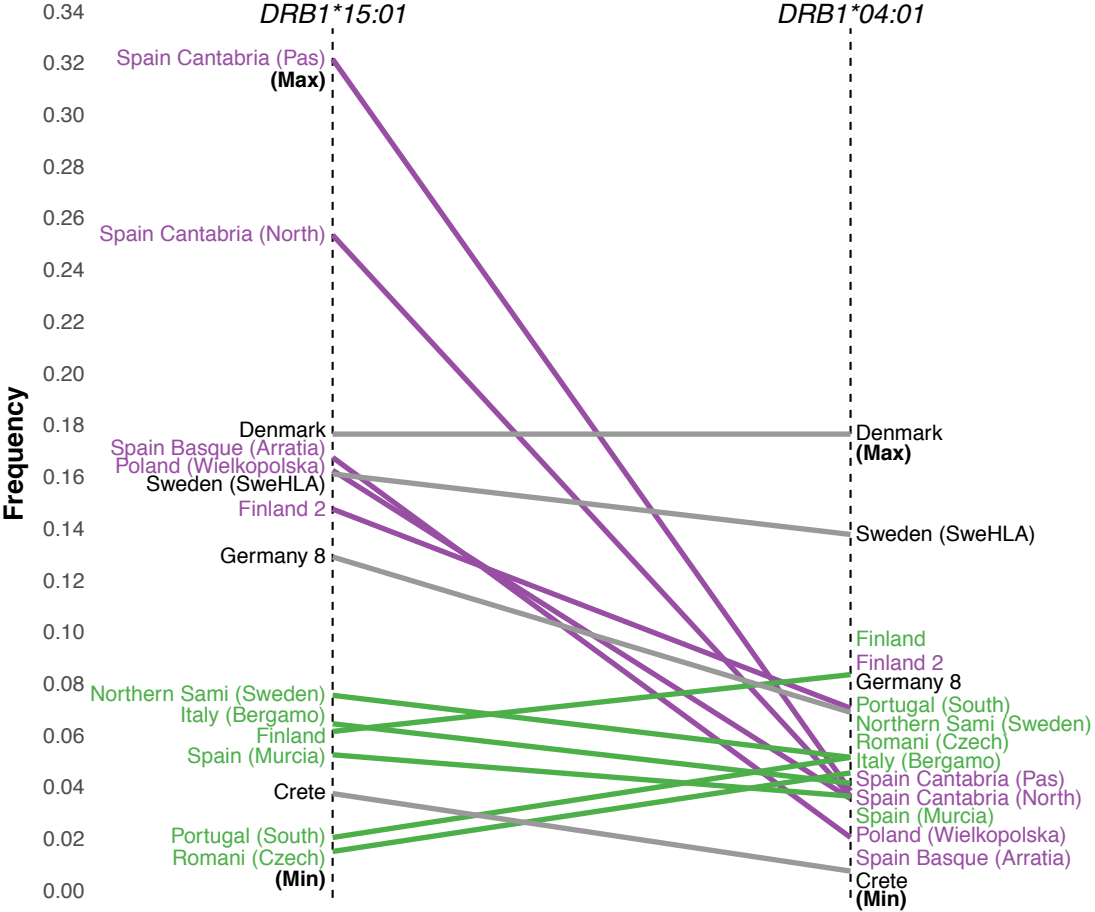

Supplement: 12916_2020_1769_MOESM27_ESM.pdf [file 12916_2020_1769_MOESM27_ESM.pdf]
